# Supplementary material for: Machine-guided representation for accurate graph-based molecular machine learning
Source: Royal Society of Chemistry journal article supplement (doi:10.1039/d0cp02709j), 2020-01-01
Supplement: d0cp02709j1.pdf [file d0cp02709j1.pdf]

# Machine-Guided Representation for Accurate Graph-Based Molecular Machine Learning

Gyoung S. Na<sup>1</sup>, Hyunju Chang<sup>1</sup>, and Hyun Woo Kim<sup>1</sup>

<sup>1</sup>Korea Research Institute of Chemical Technology (KRICT)

## 1 Selected Atomic Features

To convert SMILES representation of the molecules into the attributed graphs, we used several atomic features represented as a numerical value. We chose the atomic features which can be roughly classified into four categories as shown in Table S1. The atomic features are given by the python mendeleev package<sup>1</sup>.

Table S1: Selected atomic features and their description.

| Category   | Variable name             | Comment                                   | Unit                 |
|------------|---------------------------|-------------------------------------------|----------------------|
| Size       | atomic_volume             | Atomic volume                             | cm <sup>3</sup> /mol |
|            | atomic_weight             | Atomic weight                             | -                    |
|            | atomic_weight_uncertainty | Atomic weight uncertainty                 | -                    |
|            | atomic_radius             | Atomic radius                             | pm                   |
|            | atomic_radius_rahm        | Atomic radius by Rahm et al.              | pm                   |
|            | covalent_radius_cordero   | Covalent radius by Cordero et al.         | pm                   |
|            | covalent_radius_pyykko    | Covalent radius by Pyykko et al.          | pm                   |
|            | covalent_radius_slater    | Covalent radius by Slater                 | pm                   |
|            | vdw_radius                | Van der Waals radius                      | pm                   |
|            | vdw_radius_uff            | Van der Waals radius from the UFF         | pm                   |
|            | vdw_radius_mm3            | Van der Waals radius from the MM3 FF      | pm                   |
|            | vdw_radius_alvarez        | Van der Waals radius according to Alvarez | pm                   |
|            | density                   | Density at 295K                           | g/cm <sup>3</sup>    |
|            | lattice_constant          | Lattice constant                          | Angstrom             |
| Heat       | boiling_point             | Boiling temperature                       | K                    |
|            | melting_point             | Melting temperature                       | K                    |
|            | specific_heat             | Specific heat at 20 C                     | J/(g mol)            |
|            | fusion_heat               | Fusion heat                               | kJ/mol               |
|            | evaporation_heat          | Evaporation heat                          | kJ/mol               |
|            | heat_of_formation         | Heat of formation                         | kJ/mol               |
|            | thermal_conductivity      | Thermal conductivity at 25 C              | W/(m K)              |
| Electronic | atomic_number             | Atomic number                             | -                    |
|            | electron_affinity         | Electron affinity                         | eV                   |
|            | period                    | Period in periodic table                  | -                    |
|            | en_ghosh                  | Ghosh's scale of electronegativity        | -                    |
|            | en_pauling                | Pauling's scale of electronegativity      | -                    |
|            | en_allen                  | Allen's scale of electronegativity        | eV                   |
|            | dipole_polarizability     | Dipole polarizability                     | a.u.                 |
|            | c6_gb                     | C <sub>6</sub> dispersion coefficient     | a.u.                 |
| Abundance  | abundance_crust           | Abundance in the Earth's crust            | mg/kg                |
|            | abundance_sea             | Abundance in the seas                     | mg/L                 |

<sup>1</sup><https://mendeleev.readthedocs.io/en/stable/>

## 2 Implementation Details

For the reproducibility of the experiments in the paper, we present the implementation details of GeDML for each dataset. Also, experiment scripts, source code of GeDML, and its embedding results are available at <https://github.com/KRICT-DATA/GeDML>. Table S2 shows hyperparameter settings of GeDML for each dataset.

Table S2: Hyperparameter settings of GeDML for each dataset.  $c$  = number of graph convolutional layer of GCN in GeDML;  $l$  = dimensionality of the vector representation created by GeDML;  $\eta$  = learning rate of Adam optimizer;  $\lambda$  =  $L_2$  regularization coefficient;  $\alpha$  = margin of the triplet loss.

| Dataset       | $c$ | $l$ | $\eta$ | $\lambda$ | $\alpha$ |
|---------------|-----|-----|--------|-----------|----------|
| ESOL          | 3   | 64  | 5e-5   | 1e-5      | -        |
| FreeSolv      | 3   | 64  | 5e-5   | 1e-5      | -        |
| Lipophilicity | 3   | 64  | 5e-5   | 1e-5      | -        |
| QM7           | 3   | 64  | 5e-5   | 1e-5      | -        |
| BACE          | 3   | 64  | 1e-4   | 1e-5      | 0.7      |
| BBBP          | 3   | 64  | 1e-4   | 1e-5      | 0.6      |

## 3 Hyperparameter Analysis

To evaluate the robustness of GeDML for its hyperparameters, we measured the prediction error of GeDML by changing the batch size and the dimensionality of the vector representation from GeDML (embedding dimensionality). We conducted the experiments on ESOL dataset<sup>2</sup> and changed the batch size and the embedding dimensionality in  $\{16, 32, 64, 128\}$  and  $\{16, 32, 64, 128, 196\}$ , respectively. Fig. 1 shows the experimental results.

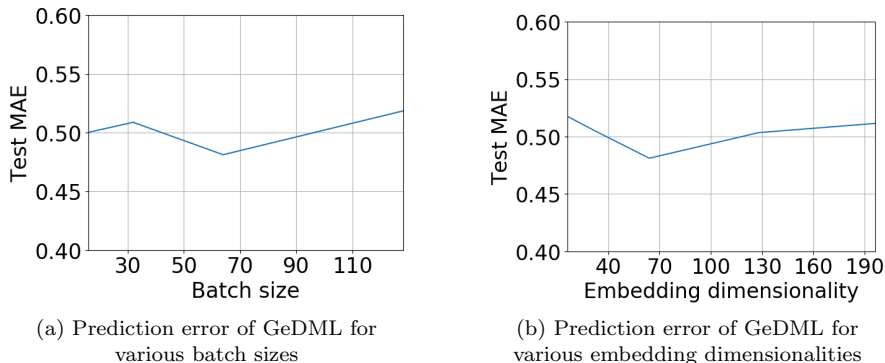

Figure 1: Prediction error of GeDML on ESOL dataset for various hyperparameter values. The prediction errors were measured by changing two hyperparameters of GeDML (batch size and embedding dimensionality).

In the experiment, GeDML showed 0.4811~0.5184 and 0.4811~0.5176 MAE for changing batch size and embedding dimensionality, respectively. As a result, the difference between the lowest and highest errors was less than 10%.

<sup>2</sup><http://moleculenet.ai/datasets-1>

## 4 RMSE

Table S3: RMSE in regression tasks for each molecular dataset. Note that the presented RMSEs are approximated values, and they were calculated based on the prediction results of each prediction model that was trained based on MAE criterion.

| Dataset       | GCN    | GeDML+LR | GeDML+FNN | GeDML+XGB |
|---------------|--------|----------|-----------|-----------|
| ESOL          | 1.2028 | 0.7018   | 0.6955    | 0.6554    |
| FreeSolv      | 1.7585 | 1.2105   | 1.1151    | 1.0131    |
| Lipophilicity | 0.9119 | 0.7041   | 0.7960    | 0.6933    |
| QM7           | 0.7315 | 0.7713   | 0.7890    | 0.6771    |
